# Supplementary material for: Incidence of Lyme Borreliosis in Europe from National Surveillance Systems (2005–2020)
Source: PubMed Central journal article supplement (PMC10122223; doi:10.1089/vbz.2022.0071), 2023-04-12
Supplement: Supp_Data.pdf [file Supp_Data.pdf]

**Incidence of Lyme Borreliosis in Europe from National Surveillance Systems (2005–2020)**

**SUPPLEMENT**

**Table S1.** Public health agencies/organizations and corresponding websites for public surveillance reports on Lyme borreliosis in European countries

| Country               | Public Health Institute responsible for surveillance reports          | Main Website URL (Language)                                                                                           | Website URL for Lyme Borreliosis (LB) Surveillance                                                                                                                                                                                                                                    | Location of case definition                                                                                                                                                                                                                                                                                                  |
|-----------------------|-----------------------------------------------------------------------|-----------------------------------------------------------------------------------------------------------------------|---------------------------------------------------------------------------------------------------------------------------------------------------------------------------------------------------------------------------------------------------------------------------------------|------------------------------------------------------------------------------------------------------------------------------------------------------------------------------------------------------------------------------------------------------------------------------------------------------------------------------|
| <b>Belgium</b>        | Sciensano                                                             | <a href="https://nrchm.wiv-isp.be/nl/default.aspx">https://nrchm.wiv-isp.be/nl/default.aspx</a><br>(Dutch/French)     | <a href="https://nrchm.wiv-isp.be/nl/peillabo/default.aspx">https://nrchm.wiv-isp.be/nl/peillabo/default.aspx</a>                                                                                                                                                                     | <a href="https://www.wiv-isp.be/Epidemio/NRC/epilabo/case_definition.pdf">https://www.wiv-isp.be/Epidemio/NRC/epilabo/case_definition.pdf</a>                                                                                                                                                                                |
| <b>Bulgaria</b>       | National Center of Infectious and Parasitic Diseases                  | <a href="https://www.ncipd.org/index.php?lang=en">https://www.ncipd.org/index.php?lang=en</a><br>(English, Bulgarian) | <a href="https://www.ncipd.org/index.php?option=com_k2&amp;view=item&amp;layout=item&amp;id=84&amp;Itemid=1337&amp;lang=bg">https://www.ncipd.org/index.php?option=com_k2&amp;view=item&amp;layout=item&amp;id=84&amp;Itemid=1337&amp;lang=bg</a>                                     | <a href="https://lex.bg/bg/laws/ldoc/2135508238">https://lex.bg/bg/laws/ldoc/2135508238</a>                                                                                                                                                                                                                                  |
|                       | National Statistical Institute (NSI)                                  | <a href="https://nsi.bg/en">https://nsi.bg/en</a><br>(English, Bulgarian)                                             | <a href="https://nsi.bg/bg/search/node?keys=%D0%97%D0%94%D0%A0%D0%90%D0%92%D0%95%D0%9E%D0%9F%D0%90%D0%97%D0%92%D0%90%D0%9D%D0%95">https://nsi.bg/bg/search/node?keys=%D0%97%D0%94%D0%A0%D0%90%D0%92%D0%95%D0%9E%D0%9F%D0%90%D0%97%D0%92%D0%90%D0%9D%D0%95</a>                         |                                                                                                                                                                                                                                                                                                                              |
| <b>Croatia</b>        | Hrvatski Zavod Za Javno Zdravstvo/Croatian Institute of Public Health | <a href="https://www.hzjz.hr/en/">https://www.hzjz.hr/en/</a><br>(Croatian, English)                                  | <a href="https://www.hzjz.hr/tag/zdravstveno-statisticki-ljetopis/">https://www.hzjz.hr/tag/zdravstveno-statisticki-ljetopis/</a>                                                                                                                                                     | <a href="https://www.hzjz.hr/wp-content/uploads/2016/10/hr_definicije.pdf">https://www.hzjz.hr/wp-content/uploads/2016/10/hr_definicije.pdf</a>                                                                                                                                                                              |
| <b>Czech Republic</b> | Státní zdravotní ústav (SZU)/The National Institute of Public Health  | <a href="http://www.szu.cz/">http://www.szu.cz/</a><br>(Czech, English)                                               | <a href="http://www.szu.cz/tema/prevence/infekcni-nemoci">http://www.szu.cz/tema/prevence/infekcni-nemoci</a>                                                                                                                                                                         | <a href="http://www.szu.cz/system-epidemiologicke-bdelosti-lymeske-borreliozy">http://www.szu.cz/system-epidemiologicke-bdelosti-lymeske-borreliozy</a><br><a href="https://www.zakonyprolidi.cz/cs/2008-473">https://www.zakonyprolidi.cz/cs/2008-473</a>                                                                   |
| <b>Estonia</b>        | Republic of Estonia: Health Board (Terviseamet)                       | <a href="https://www.terviseamet.ee/en">https://www.terviseamet.ee/en</a><br>(Estonia, Russian, English)              | <a href="https://www.terviseamet.ee/et/nakkushaigus-ed-menuu/tervishoiutootajale/nakkushaigustesse-haigestumine#Nakkushaigustesse%20haigestu">https://www.terviseamet.ee/et/nakkushaigus-ed-menuu/tervishoiutootajale/nakkushaigustesse-haigestumine#Nakkushaigustesse%20haigestu</a> | <a href="https://www.terviseamet.ee/et/nakkushaigus-ed-menuu/tervishoiutootajale/teatistevormid">https://www.terviseamet.ee/et/nakkushaigus-ed-menuu/tervishoiutootajale/teatistevormid</a><br><a href="https://www.riigiteataja.ee/akt/110042020002?LeiaKehtiv">https://www.riigiteataja.ee/akt/110042020002?LeiaKehtiv</a> |

|                            |                                               |                                                                                                                                |                                                                                                                                                                                                                                                                                                                                                                                                                                                                                                                                                                                             |                                                                                                                                                                                                                                                                                                                                                                                                                                                                          |
|----------------------------|-----------------------------------------------|--------------------------------------------------------------------------------------------------------------------------------|---------------------------------------------------------------------------------------------------------------------------------------------------------------------------------------------------------------------------------------------------------------------------------------------------------------------------------------------------------------------------------------------------------------------------------------------------------------------------------------------------------------------------------------------------------------------------------------------|--------------------------------------------------------------------------------------------------------------------------------------------------------------------------------------------------------------------------------------------------------------------------------------------------------------------------------------------------------------------------------------------------------------------------------------------------------------------------|
| <b>Finland</b>             | Finnish Institute of Health and Welfare (THL) | <a href="https://thl.fi/en/web/thlfi-en">https://thl.fi/en/web/thlfi-en</a><br>(Finnish, Swedish, English)                     | <a href="https://thl.fi/fi/web/infektiotaudit-ja-rokotukset/seurantatarjestelmat-ja-rekisterit/tartuntatautirekisteri/tartuntatautien-esiintyvyytilastot/tartuntatautien-esiintyvyyys-suomessa-raportit">https://thl.fi/fi/web/infektiotaudit-ja-rokotukset/seurantatarjestelmat-ja-rekisterit/tartuntatautirekisteri/tartuntatautien-esiintyvyytilastot/tartuntatautien-esiintyvyyys-suomessa-raportit</a><br><br><a href="https://sampo.thl.fi/pivot/prod/en/infestat/boorre/fact_infestat_borre">https://sampo.thl.fi/pivot/prod/en/infestat/boorre/fact_infestat_borre</a> <sup>1</sup> | <a href="https://wwwnc.cdc.gov/eid/article/23/8/16-1273_article">https://wwwnc.cdc.gov/eid/article/23/8/16-1273_article</a><br><a href="https://thl.fi/fi/web/infektiotaudit-ja-rokotukset/taudit-ja-torjunta/taudit-ja-taudinaiheuttajat-a-o/borrelia/borreliaosin-seuranta-ja-esiintyvyyys-suomessa">https://thl.fi/fi/web/infektiotaudit-ja-rokotukset/taudit-ja-torjunta/taudit-ja-taudinaiheuttajat-a-o/borrelia/borreliaosin-seuranta-ja-esiintyvyyys-suomessa</a> |
| <b>France</b>              | Sentinel Network                              | <a href="http://www.sentiweb.fr/">http://www.sentiweb.fr/</a><br>(French)                                                      | <a href="https://www.sentiweb.fr/?page=bilan">https://www.sentiweb.fr/?page=bilan</a>                                                                                                                                                                                                                                                                                                                                                                                                                                                                                                       | <a href="https://www.sentiweb.fr/france/fr/?page=maladies&amp;mal=18">https://www.sentiweb.fr/france/fr/?page=maladies&amp;mal=18</a>                                                                                                                                                                                                                                                                                                                                    |
| <b>Germany</b>             | Robert Koch Institute                         | <a href="https://www.rki.de/EN/Home/homepage_node.html">https://www.rki.de/EN/Home/homepage_node.html</a><br>(German, English) | <a href="https://www.rki.de/DE/Content/Infekt/Jahrbuch/jahrbuch_node.html">https://www.rki.de/DE/Content/Infekt/Jahrbuch/jahrbuch_node.html</a> <sup>2</sup>                                                                                                                                                                                                                                                                                                                                                                                                                                | <a href="https://www.rki.de/DE/Content/Infekt/EpidBull/Archiv/2009/Ausgaben/05_09.pdf?__blob=publicationFile">https://www.rki.de/DE/Content/Infekt/EpidBull/Archiv/2009/Ausgaben/05_09.pdf?__blob=publicationFile</a>                                                                                                                                                                                                                                                    |
| <b>Hungary</b>             | National Center for Epidemiology              | <a href="http://www.oek.hu/oek.web">http://www.oek.hu/oek.web</a><br>(Hungarian)                                               | <a href="http://www.oek.hu/oek.web?nid=509&amp;pid=3&amp;to=.2475.2465&amp;lang=hun">http://www.oek.hu/oek.web?nid=509&amp;pid=3&amp;to=.2475.2465&amp;lang=hun</a>                                                                                                                                                                                                                                                                                                                                                                                                                         | <a href="https://net.jogtar.hu/jogszabaly?docid=99800018.nm">https://net.jogtar.hu/jogszabaly?docid=99800018.nm</a><br><a href="https://net.jogtar.hu/getpdf?docid=99800018.nm&amp;targetdate=&amp;printTitle=">https://net.jogtar.hu/getpdf?docid=99800018.nm&amp;targetdate=&amp;printTitle=</a>                                                                                                                                                                       |
|                            | The National Public Health Centre             | <a href="https://www.nnk.gov.hu/">https://www.nnk.gov.hu/</a><br>(Hungarian)                                                   | <a href="https://www.antsz.hu/felso_menu/temaink/jarvany/Fertozo_betegsegek/Fertozo_eves_jelentesk">https://www.antsz.hu/felso_menu/temaink/jarvany/Fertozo_betegsegek/Fertozo_eves_jelentesk</a>                                                                                                                                                                                                                                                                                                                                                                                           |                                                                                                                                                                                                                                                                                                                                                                                                                                                                          |
| <b>Republic of Ireland</b> | Health Protection Surveillance Centre         | <a href="https://www.hpsc.ie/">https://www.hpsc.ie/</a><br>(English)                                                           | <a href="https://www.hpsc.ie/a-z/vectorborne/lymedisease/epidemiological_data/">https://www.hpsc.ie/a-z/vectorborne/lymedisease/epidemiological_data/</a>                                                                                                                                                                                                                                                                                                                                                                                                                                   | <a href="https://www.hpsc.ie/a-z/vectorborne/lymedisease/casedefinition/">https://www.hpsc.ie/a-z/vectorborne/lymedisease/casedefinition/</a>                                                                                                                                                                                                                                                                                                                            |

<sup>1</sup> Borreliosis in the outpatient treatment notification system (AvoHilmo) & Borreliosis in the infectious disease register

<sup>2</sup> LB does not appear in the Infection epidemiological yearbook on the webpage

|                  |                                                                                                               |                                                                                                                                                                |                                                                                                                                                                                                                                                                                                                                                                                                                                                                                   |                                                                                                                                                                                                                                                                                                                                                                          |
|------------------|---------------------------------------------------------------------------------------------------------------|----------------------------------------------------------------------------------------------------------------------------------------------------------------|-----------------------------------------------------------------------------------------------------------------------------------------------------------------------------------------------------------------------------------------------------------------------------------------------------------------------------------------------------------------------------------------------------------------------------------------------------------------------------------|--------------------------------------------------------------------------------------------------------------------------------------------------------------------------------------------------------------------------------------------------------------------------------------------------------------------------------------------------------------------------|
| <b>Latvia</b>    | Latvian Center for Disease Prevention and Control                                                             | <a href="https://www.spkc.gov.lv/lv">https://www.spkc.gov.lv/lv</a> (Latvian)                                                                                  | <a href="https://www.spkc.gov.lv/lv/infekcijas-slimibas-statistika-un-petijumi">https://www.spkc.gov.lv/lv/infekcijas-slimibas-statistika-un-petijumi</a><br><a href="https://www.spkc.gov.lv/lv/latvijas-veselibas-aprupes-statistikas-gadagramata">https://www.spkc.gov.lv/lv/latvijas-veselibas-aprupes-statistikas-gadagramata</a>                                                                                                                                            | <a href="https://ssk10.spkc.gov.lv/rsc/SSK3_sejums_20190922.pdf">https://ssk10.spkc.gov.lv/rsc/SSK3_sejums_20190922.pdf</a><br><a href="https://ssk10.spkc.gov.lv/ssk/A692">https://ssk10.spkc.gov.lv/ssk/A692</a><br><a href="https://likumi.lv/doc.php?id=20667">https://likumi.lv/doc.php?id=20667</a> (No Laboratory detection)                                      |
| <b>Lithuania</b> | National Public Health Center under the Ministry of Health                                                    | <a href="https://nvsc.lrv.lt/en">https://nvsc.lrv.lt/en</a> (Lithuanian, English)                                                                              | <a href="https://nvsc.lrv.lt/lt/uzkreiciamuju-ligu-valdymas/statistika-apzvalgos-1/sergamumo-uzkreiciamosiomis-ligomis-apzvalgos">https://nvsc.lrv.lt/lt/uzkreiciamuju-ligu-valdymas/statistika-apzvalgos-1/sergamumo-uzkreiciamosiomis-ligomis-apzvalgos</a>                                                                                                                                                                                                                     | <a href="https://e-seimas.lrs.lt/portal/legalAct/lt/TAID/TAIS.204745/asr">https://e-seimas.lrs.lt/portal/legalAct/lt/TAID/TAIS.204745/asr</a><br><a href="https://nvsc.lrv.lt/lt/d-u-k/dazniausiai-uzduodami-klausimai-apie-uzkreiciamasias-ligas/laimo-liga-1">https://nvsc.lrv.lt/lt/d-u-k/dazniausiai-uzduodami-klausimai-apie-uzkreiciamasias-ligas/laimo-liga-1</a> |
| <b>Norway</b>    | Norwegian Institute of Public Health (NIPH)<br>Norwegian Surveillance System for Communicable Diseases (MSIS) | <a href="https://www.fhi.no/en/">https://www.fhi.no/en/</a> (Norwegian, English)<br><a href="http://www.msis.no/">http://www.msis.no/</a> (Norwegian, English) | <a href="https://www.fhi.no/sys/sok/?type=con-32/cat-750.&amp;term=Lyme#main">https://www.fhi.no/sys/sok/?type=con-32/cat-750.&amp;term=Lyme#main</a><br><a href="http://www.msis.no/DynamiskRapport.aspx">http://www.msis.no/DynamiskRapport.aspx</a>                                                                                                                                                                                                                            | <a href="https://www.fhi.no/contentassets/343f33f920bf4398aff1021acb5e9c18/msis_meldingskriterier_per_09042021.pdf">https://www.fhi.no/contentassets/343f33f920bf4398aff1021acb5e9c18/msis_meldingskriterier_per_09042021.pdf</a>                                                                                                                                        |
| <b>Poland</b>    | National Institute of Public Health PZH - National Research Institute                                         | <a href="https://www.pzh.gov.pl/">https://www.pzh.gov.pl/</a> (Polish)                                                                                         | <a href="http://wwwold.pzh.gov.pl/oldpage/epimeld/index_p.html#uu">http://wwwold.pzh.gov.pl/oldpage/epimeld/index_p.html#uu</a><br><a href="http://wwwold.pzh.gov.pl/oldpage/epimeld/index_p.html">http://wwwold.pzh.gov.pl/oldpage/epimeld/index_p.html</a>                                                                                                                                                                                                                      | <a href="http://wwwold.pzh.gov.pl/oldpage/epimeld/inne/Def_PL2_6b.pdf">http://wwwold.pzh.gov.pl/oldpage/epimeld/inne/Def_PL2_6b.pdf</a>                                                                                                                                                                                                                                  |
| <b>Portugal</b>  | National Institute of Statistics                                                                              | <a href="https://www.ine.pt/xportal/xmain?xpid=INE&amp;xpgid=ine_main">https://www.ine.pt/xportal/xmain?xpid=INE&amp;xpgid=ine_main</a> (Portuguese, English)  | <a href="https://www.ine.pt/xportal/xmain?xpid=INE&amp;xpgid=ine_publicacoes&amp;PUBLICACOEStipo=ea&amp;PUBLICACOEScolecao=107773&amp;selTab=tab0&amp;xlang=pt">https://www.ine.pt/xportal/xmain?xpid=INE&amp;xpgid=ine_publicacoes&amp;PUBLICACOEStipo=ea&amp;PUBLICACOEScolecao=107773&amp;selTab=tab0&amp;xlang=pt</a>                                                                                                                                                         | <a href="http://www.sis-ram.pt/sinave/Uploads/Anexos/Orientacao_para_autoridade_saude_15_10_20151.pdf">http://www.sis-ram.pt/sinave/Uploads/Anexos/Orientacao_para_autoridade_saude_15_10_20151.pdf</a>                                                                                                                                                                  |
| <b>Romania</b>   | National Institute of Public Health                                                                           | <a href="http://www.cnsctb.ro/">http://www.cnsctb.ro/</a> (Romanian)                                                                                           | <a href="http://www.cnsctb.ro/index.php/rapoarte-anuale?limit=10&amp;limitstart=0">http://www.cnsctb.ro/index.php/rapoarte-anuale?limit=10&amp;limitstart=0</a><br><a href="http://www.cnsctb.ro/index.php/analiza-date-supraveghere/boala-lyme-1?limit=10&amp;limitstart=0">http://www.cnsctb.ro/index.php/analiza-date-supraveghere/boala-lyme-1?limit=10&amp;limitstart=0</a><br><a href="https://insp.gov.ro/rapoarte-si-studii/">https://insp.gov.ro/rapoarte-si-studii/</a> | <a href="https://www.cnsctb.ro/index.php/metodologii/boala-lyme/1394-boala-lyme-metodologie-de-supraveghere-actualizare-11-02-2020/file">https://www.cnsctb.ro/index.php/metodologii/boala-lyme/1394-boala-lyme-metodologie-de-supraveghere-actualizare-11-02-2020/file</a>                                                                                              |

|                    |                                                                                                 |                                                                                                                      |                                                                                                                                                                                                                                                                                                                                                                                                                                                                                                                                                                                                                                                                                                                                                                                                                                                           |                                                                                                                                                                                                                                                                                                         |
|--------------------|-------------------------------------------------------------------------------------------------|----------------------------------------------------------------------------------------------------------------------|-----------------------------------------------------------------------------------------------------------------------------------------------------------------------------------------------------------------------------------------------------------------------------------------------------------------------------------------------------------------------------------------------------------------------------------------------------------------------------------------------------------------------------------------------------------------------------------------------------------------------------------------------------------------------------------------------------------------------------------------------------------------------------------------------------------------------------------------------------------|---------------------------------------------------------------------------------------------------------------------------------------------------------------------------------------------------------------------------------------------------------------------------------------------------------|
| <b>Russia</b>      | Federal Service for Supervision in the field of Consumer Rights Protection and Human Well-Being | <a href="https://www.rosпотребнадзор.ru/">https://www.rosпотребнадзор.ru/</a> (Russian)                              | <a href="https://www.rosпотребнадзор.ru/documents/documents.php?back_url_admin=%2Fbitrix%2Fadmin%2Fiblock_admin.php%3Ftype%3Ddocuments%26lang%3Dru%26admin%3DY&amp;clear_cache=Y&amp;arrFilter_ff%5BNAME%5D=&amp;arrFilter_pf%5BVID_DOC%5D=97&amp;arrFilter_pf%5BNUM_DOC%5D=&amp;arrFilter_pf%5BDAT_DOC%5D=&amp;arrFilter_pf%5BGOD%5D%5BLEFT%5D=&amp;arrFilter_pf%5BGOD%5D%5BRIGHT%5D=&amp;set_filter=Search+&amp;set_filter=Y">https://www.rosпотребнадзор.ru/documents/documents.php?back_url_admin=%2Fbitrix%2Fadmin%2Fiblock_admin.php%3Ftype%3Ddocuments%26lang%3Dru%26admin%3DY&amp;clear_cache=Y&amp;arrFilter_ff%5BNAME%5D=&amp;arrFilter_pf%5BVID_DOC%5D=97&amp;arrFilter_pf%5BNUM_DOC%5D=&amp;arrFilter_pf%5BDAT_DOC%5D=&amp;arrFilter_pf%5BGOD%5D%5BLEFT%5D=&amp;arrFilter_pf%5BGOD%5D%5BRIGHT%5D=&amp;set_filter=Search+&amp;set_filter=Y</a> | <a href="https://nnoi.ru/clinical-guid-directed">https://nnoi.ru/clinical-guid-directed</a>                                                                                                                                                                                                             |
| <b>Serbia</b>      | Institute of Public Health Serbia's <i>Dr Milan Jovanovic Batut</i>                             | <a href="https://www.batut.org.rs/index.php?lang=2">https://www.batut.org.rs/index.php?lang=2</a> (Serbian, English) | <a href="https://www.batut.org.rs/index.php?content=279">https://www.batut.org.rs/index.php?content=279</a>                                                                                                                                                                                                                                                                                                                                                                                                                                                                                                                                                                                                                                                                                                                                               | <a href="https://www.pravno-informacioni-sistem.rs/SIGlasnikPortal/eli/rep/sgrs/skupstina/zakon/2016/15/8/reg">https://www.pravno-informacioni-sistem.rs/SIGlasnikPortal/eli/rep/sgrs/skupstina/zakon/2016/15/8/reg</a>                                                                                 |
| <b>Slovakia</b>    | Public Health Authority of Slovak Republic                                                      | <a href="https://www.uvzsr.sk/en/">https://www.uvzsr.sk/en/</a> (Slovak, English)                                    | <a href="https://www.uvzsr.sk/index.php?option=com_content&amp;view=category&amp;id=25:vyrona-sprava&amp;layout=blog&amp;Itemid=34&amp;layout=default">https://www.uvzsr.sk/index.php?option=com_content&amp;view=category&amp;id=25:vyrona-sprava&amp;layout=blog&amp;Itemid=34&amp;layout=default</a>                                                                                                                                                                                                                                                                                                                                                                                                                                                                                                                                                   | <a href="https://www.ruvzse.sk/formulare/vs_ruvzse_2017.pdf">https://www.ruvzse.sk/formulare/vs_ruvzse_2017.pdf</a>                                                                                                                                                                                     |
| <b>Slovenia</b>    | National Institute of Public Health                                                             | <a href="https://www.nijz.si/en">https://www.nijz.si/en</a> (Slovene, English)                                       | <a href="https://www.nijz.si/sl/nijz/revije/zdravstveni-statisticni-letopis-slovenije">https://www.nijz.si/sl/nijz/revije/zdravstveni-statisticni-letopis-slovenije</a>                                                                                                                                                                                                                                                                                                                                                                                                                                                                                                                                                                                                                                                                                   | <a href="https://www.nijz.si/sl/definicije-prijavljivih-nalezljivih-bolezni-zanamene-epidemioloskega-spremljanja">https://www.nijz.si/sl/definicije-prijavljivih-nalezljivih-bolezni-zanamene-epidemioloskega-spremljanja</a>                                                                           |
| <b>Switzerland</b> | The Sentinel Network                                                                            | <a href="https://www.sentinella.ch/fr/info">https://www.sentinella.ch/fr/info</a> (French, Italian, English)         | <a href="http://www.sentinella.ch/fr/publications/">http://www.sentinella.ch/fr/publications/</a><br><a href="https://www.bag.admin.ch/bag/de/home/krankheiten/ausbrueche-epidemien-pandemien/aktuelle-ausbrueche-epidemien/zeckenuebertragene-krankheiten.html">https://www.bag.admin.ch/bag/de/home/krankheiten/ausbrueche-epidemien-pandemien/aktuelle-ausbrueche-epidemien/zeckenuebertragene-krankheiten.html</a>                                                                                                                                                                                                                                                                                                                                                                                                                                    | <a href="https://www.bag.admin.ch/bag/fr/home/krankheiten/infektionskrankheiten-bekaempfen/meldesysteme-infektionskrankheiten/meldepflichtige-ik.html">https://www.bag.admin.ch/bag/fr/home/krankheiten/infektionskrankheiten-bekaempfen/meldesysteme-infektionskrankheiten/meldepflichtige-ik.html</a> |

|                                                          |                                                                      |                                                                                                                                                            |                                                                                                                                                                                                                                                                                                        |                                                                                                                                                                                                                                                                                                                                                                                                                                                                                                                                                                                                                                           |
|----------------------------------------------------------|----------------------------------------------------------------------|------------------------------------------------------------------------------------------------------------------------------------------------------------|--------------------------------------------------------------------------------------------------------------------------------------------------------------------------------------------------------------------------------------------------------------------------------------------------------|-------------------------------------------------------------------------------------------------------------------------------------------------------------------------------------------------------------------------------------------------------------------------------------------------------------------------------------------------------------------------------------------------------------------------------------------------------------------------------------------------------------------------------------------------------------------------------------------------------------------------------------------|
| <b>England, Wales,<br/>Northern Ireland<br/>Scotland</b> | Government services and<br>information<br>Health Protection Scotland | <a href="https://www.gov.uk/">https://www.gov.uk/</a><br>(English)<br><a href="https://www.hps.scot.nhs.uk/">https://www.hps.scot.nhs.uk/</a><br>(English) | <a href="https://www.gov.uk/government/publications/zoonoses-uk-annual-reports">https://www.gov.uk/government/publications/zoonoses-uk-annual-reports</a><br><a href="https://www.hps.scot.nhs.uk/data/latest-epidemiology-reports/">https://www.hps.scot.nhs.uk/data/latest-epidemiology-reports/</a> | <a href="https://www.nice.org.uk/guidance/ng95/resources/lyme-disease-pdf-1837756839877">https://www.nice.org.uk/guidance/ng95/resources/lyme-disease-pdf-1837756839877</a><br><br><a href="https://www.gov.uk/government/collections/lyme-disease-guidance-data-and-analysis">https://www.gov.uk/government/collections/lyme-disease-guidance-data-and-analysis</a><br><br><a href="https://www.gov.uk/government/publications/lyme-borreliosis-epidemiology/lyme-borreliosis-epidemiology-and-surveillance">https://www.gov.uk/government/publications/lyme-borreliosis-epidemiology/lyme-borreliosis-epidemiology-and-surveillance</a> |
|----------------------------------------------------------|----------------------------------------------------------------------|------------------------------------------------------------------------------------------------------------------------------------------------------------|--------------------------------------------------------------------------------------------------------------------------------------------------------------------------------------------------------------------------------------------------------------------------------------------------------|-------------------------------------------------------------------------------------------------------------------------------------------------------------------------------------------------------------------------------------------------------------------------------------------------------------------------------------------------------------------------------------------------------------------------------------------------------------------------------------------------------------------------------------------------------------------------------------------------------------------------------------------|

**Table S2.** Incidence<sup>a</sup> of lyme borreliosis from national public surveillance reports (2005–2019) by European Region and Country

|                                         | Incidence (LB Cases per 100,000 population) |       |       |       |       |       |       |       |       |       |       |       |       |       |       |
|-----------------------------------------|---------------------------------------------|-------|-------|-------|-------|-------|-------|-------|-------|-------|-------|-------|-------|-------|-------|
|                                         | 2005                                        | 2006  | 2007  | 2008  | 2009  | 2010  | 2011  | 2012  | 2013  | 2014  | 2015  | 2016  | 2017  | 2018  | 2019  |
| <b>Eastern Europe</b>                   |                                             |       |       |       |       |       |       |       |       |       |       |       |       |       |       |
| <b>Bulgaria</b>                         |                                             |       |       | 10.9  | 11.7  | 7.9   | 8.1   | 5.7   | 5.2   | 5.6   | 6.6   | 4.1   | 5.7   | 8.6   | 5.4   |
| <b>Czech Republic</b>                   |                                             |       |       | 41.7  | 36.8  | 34.2  | 46.1  | 31.4  | 44.2  | 35.6  | 27.6  | 44.4  | 37.2  | 44.5  | 38.5  |
| <b>Hungary</b>                          | 14.2                                        | 12.2  | 9.4   | 18.0  | 17.3  | 23.5  | 16.8  | 15.3  | 11.3  | 6.2   | 14.4  | 13.6  |       |       |       |
| <b>Poland</b>                           | 11.5                                        | 17.5  | 20.3  | 21.7  | 27.1  | 23.6  | 23.8  | 22.8  | 33.2  | 36.0  | 35.4  | 55.2  | 56.0  | 52.5  |       |
| <b>Romania</b>                          |                                             |       |       |       |       | 1.3   | 1.8   | 3.5   | 2.1   | 1.3   | 1.7   | 1.3   | 1.7   | 2.7   | 2.1   |
| <b>Russia</b>                           |                                             |       |       |       | 6.8   | 5.0   | 7.0   | 5.8   | 4.0   | 4.4   | 5.1   | 4.2   | 4.6   | 4.4   | 5.5   |
| <b>Slovakia</b>                         | 15.7                                        | 13.6  | 15.8  | 19.4  | 17.1  | 19.6  | 15.8  | 14.0  | 18.4  | 12.6  | 16.8  | 20.4  | 14.8  | 18.0  | 14.0  |
| <b>Slovenia</b>                         | 206.4                                       | 222.9 | 193.0 | 255.5 | 308.7 | 244.1 | 273.8 | 239.8 | 337.0 | 188.7 | 181.4 | 207.0 | 219.4 | 364.5 |       |
| <b>Northern Europe</b>                  |                                             |       |       |       |       |       |       |       |       |       |       |       |       |       |       |
| <i>Baltic states</i>                    |                                             |       |       |       |       |       |       |       |       |       |       |       |       |       |       |
| <b>Estonia</b>                          | 20.9                                        | 35.8  | 53.7  | 106.0 | 133.3 | 128.4 | 171.6 | 115.4 | 85.7  | 98.0  | 106.5 | 107.9 | 149.2 | 173.1 |       |
| <b>Latvia</b>                           |                                             |       | 27.5  | 21.5  | 31.9  | 37.0  | 42.1  | 35.6  | 22.6  | 23.5  | 25.0  | 24.4  | 31.5  | 25.0  | 25.2  |
| <b>Lithuania</b>                        | 34.6                                        | 61.7  | 42.9  | 35.9  | 113.1 | 81.4  | 79.6  | 81.2  | 86.4  | 76.7  | 77.1  | 100.9 | 99.2  | 81.6  | 117.8 |
| <i>Nordic countries</i>                 |                                             |       |       |       |       |       |       |       |       |       |       |       |       |       |       |
| <b>Finland</b>                          | 23.5                                        | 21.6  | 25.0  | 24.0  | 28.0  | 27.0  | 31.0  | 29.0  | 31.0  | 31.0  | 35.0  | 35.0  | 42.0  |       |       |
| <b>Norway</b>                           | 6.0                                         | 6.8   | 7.0   | 7.3   | 5.7   | 5.9   | 5.0   | 5.1   | 6.3   | 6.3   | 8.2   | 7.8   | 8.3   | 7.9   | 9.2   |
| <i>The United Kingdom &amp; Ireland</i> |                                             |       |       |       |       |       |       |       |       |       |       |       |       |       |       |
| <b>England &amp; Wales</b>              | 1.1                                         | 1.4   | 1.5   | 1.5   | 1.8   | 1.9   | 1.7   | 1.8   | 1.6   | 1.5   | 1.8   | 1.9   | 2.7   |       |       |
| <b>Ireland</b>                          |                                             |       |       |       |       |       |       | 0.4   | 0.3   | 0.4   | 0.3   | 0.4   | 0.3   | 0.3   |       |
| <b>Northern Ireland</b>                 | 0                                           | 0     | 0.4   | 0.9   | 0.1   | 0     | 0.7   | 0.1   | 0.3   | 0.1   | 0.1   | 0.2   | 0.1   |       |       |
| <b>Scotland</b>                         |                                             | 3.3   | 4.5   | 5.5   | 4.4   | 5.9   | 4.3   | 3.9   | 3.3   | 4.2   | 3.7   | 3.2   | 3.1   | 4.4   | 5.7   |
| <b>Southern Europe</b>                  |                                             |       |       |       |       |       |       |       |       |       |       |       |       |       |       |
| <b>Croatia</b>                          | 5                                           | 6.9   | 6.1   | 10.1  | 10    | 11.4  | 11.6  | 10.1  | 15.5  | 11.0  | 10.3  | 11.1  | 10.3  | 19.7  | 11.5  |
| <b>Portugal</b>                         | 0                                           | 0     | 0.1   | 0.1   | 0.1   | 0.1   | 0     | 0.1   | 0.1   | 0.1   | 0.1   | 0.2   | 0.2   | 0.2   |       |
| <b>Serbia</b>                           | 5.6                                         | 6.9   | 8.8   | 11.7  | 12.6  | 13.3  | 13.7  | 13.3  | 13.1  | 8     | 6.8   | 8.4   | 7.7   |       |       |
| <b>Western Europe</b>                   |                                             |       |       |       |       |       |       |       |       |       |       |       |       |       |       |
| <b>Belgium</b>                          | 16.2                                        | 13.5  | 10.1  | 12.8  | 11.5  | 10.4  | 11    | 11.7  | 16.7  | 20.2  | 13.9  | 17.3  | 13.4  | 12.2  |       |
| <b>France</b>                           |                                             |       |       |       | 42    | 42    | 41    | 44    | 55    | 41    | 51    | 84    | 69    | 104   | 76    |
| <b>Germany</b>                          |                                             |       |       |       |       |       |       |       |       |       |       | 37.9  | 32.9  | 38.8  | 35.6  |
| <b>Switzerland</b>                      |                                             |       |       | 156   | 114   | 83    | 126   | 124   | 123   | 109   |       |       |       |       |       |

<sup>a</sup>Incidence proportion is the number of (reported LB confirmed/total) cases per 100,000 population per year.

Note: Gaps indicate no data were reported for that year.

Total population living in Europe, based on available census data (Eurostat Regional Statistics 2022): 844,328,483 (Regional statistics by NUTS classification: Population and area. Eurostat. Updated Jun 02, 2022. Accessed Nov 15, 2022. [https://ec.europa.eu/eurostat/databrowser/explore/all/general?lang=en&subtheme=reg\\_reg\\_dem\\_reg\\_dempoar&display=list&sort=category](https://ec.europa.eu/eurostat/databrowser/explore/all/general?lang=en&subtheme=reg_reg_dem_reg_dempoar&display=list&sort=category))

**Table S3** Countries and sub-national areas in Europe<sup>a</sup> with average LB incidence >10 per 100,000 PPY and populations estimates of persons at risk

| Country  | Sub-national area | Average Incidence (per 100,000) | Regional Populations (if >10 per 10,000) | Population at Risk | National Population | % of Population at Risk |          |         |      |           |             |             |     |         |      |           |        |      |           |         |      |           |        |      |           |         |      |           |      |      |           |             |      |           |         |                |      |             |              |              |     |              |      |           |             |      |           |               |       |             |                 |      |           |           |      |           |                 |      |             |           |      |           |            |      |           |               |      |           |        |      |             |                  |      |           |         |      |           |      |      |           |         |       |       |           |             |             |     |      |       |         |          |      |           |       |      |          |        |       |          |       |       |          |            |      |          |       |       |          |       |       |          |       |       |          |       |       |
|----------|-------------------|---------------------------------|------------------------------------------|--------------------|---------------------|-------------------------|----------|---------|------|-----------|-------------|-------------|-----|---------|------|-----------|--------|------|-----------|---------|------|-----------|--------|------|-----------|---------|------|-----------|------|------|-----------|-------------|------|-----------|---------|----------------|------|-------------|--------------|--------------|-----|--------------|------|-----------|-------------|------|-----------|---------------|-------|-------------|-----------------|------|-----------|-----------|------|-----------|-----------------|------|-------------|-----------|------|-----------|------------|------|-----------|---------------|------|-----------|--------|------|-------------|------------------|------|-----------|---------|------|-----------|------|------|-----------|---------|-------|-------|-----------|-------------|-------------|-----|------|-------|---------|----------|------|-----------|-------|------|----------|--------|-------|----------|-------|-------|----------|------------|------|----------|-------|-------|----------|-------|-------|----------|-------|-------|----------|-------|-------|
| Belgium  | Flemish Region    | 12.8                            | 1,068,643.3                              | 1,444,827.7        | 11,322,022.7        | 0.1                     |          |         |      |           |             |             |     |         |      |           |        |      |           |         |      |           |        |      |           |         |      |           |      |      |           |             |      |           |         |                |      |             |              |              |     |              |      |           |             |      |           |               |       |             |                 |      |           |           |      |           |                 |      |             |           |      |           |            |      |           |               |      |           |        |      |             |                  |      |           |         |      |           |      |      |           |         |       |       |           |             |             |     |      |       |         |          |      |           |       |      |          |        |       |          |       |       |          |            |      |          |       |       |          |       |       |          |       |       |          |       |       |
|          | Walloon Brabant   | 41.9                            | 376,184.3                                |                    |                     |                         | Bulgaria | Dobrich | 14.0 | 173,928.3 | 1,099,950.0 | 7,000,518.3 | 0.2 | Gabrovo | 52.3 | 108,418.7 | Lovech | 13.0 | 124,793.3 | Montana | 23.5 | 129,617.3 | Pernik | 24.3 | 120,830.3 | Razgrad | 24.6 | 112,244.0 | Ruse | 14.5 | 218,456.3 | Targovishte | 14.3 | 111,661.7 | Czechia | Jihocesky kraj | 73.8 | 1,360,998.0 | 10,626,430.0 | 10,653,156.3 | 1.0 | Jihomoravsky | 25.7 | 550,688.0 | Karlovarsky | 20.7 | 640,909.0 | Kraj Vysocina | 118.5 | 1,184,729.0 | Kralovehradecky | 47.6 | 295,285.0 | Liberecky | 65.9 | 441,608.0 | Moravskoslezsky | 30.5 | 1,204,346.0 | Olomoucky | 92.8 | 632,547.0 | Pardubicky | 39.5 | 519,125.0 | Plzensky kraj | 38.1 | 582,601.0 | Prague | 17.8 | 1,301,135.0 | Stredocesky kraj | 31.4 | 820,580.0 | Ustecky | 28.4 | 509,019.0 | Zlin | 78.4 | 582,860.0 | Estonia | Harju | 149.6 | 503,920.0 | 1,177,920.0 | 1,179,085.3 | 1.0 | Hilu | 434.4 | 9,297.7 | Ida-Viru | 19.4 | 104,906.3 | Jarva | 92.3 | 30,047.7 | Jogeva | 116.8 | 29,512.7 | Laane | 334.0 | 22,348.7 | Laane-Viru | 54.2 | 56,674.0 | Parnu | 263.7 | 80,744.7 | Polva | 186.8 | 26,763.7 | Rapla | 249.3 | 33,198.7 | Saare | 920.4 |
| Bulgaria | Dobrich           | 14.0                            | 173,928.3                                | 1,099,950.0        | 7,000,518.3         | 0.2                     |          |         |      |           |             |             |     |         |      |           |        |      |           |         |      |           |        |      |           |         |      |           |      |      |           |             |      |           |         |                |      |             |              |              |     |              |      |           |             |      |           |               |       |             |                 |      |           |           |      |           |                 |      |             |           |      |           |            |      |           |               |      |           |        |      |             |                  |      |           |         |      |           |      |      |           |         |       |       |           |             |             |     |      |       |         |          |      |           |       |      |          |        |       |          |       |       |          |            |      |          |       |       |          |       |       |          |       |       |          |       |       |
|          | Gabrovo           | 52.3                            | 108,418.7                                |                    |                     |                         |          |         |      |           |             |             |     |         |      |           |        |      |           |         |      |           |        |      |           |         |      |           |      |      |           |             |      |           |         |                |      |             |              |              |     |              |      |           |             |      |           |               |       |             |                 |      |           |           |      |           |                 |      |             |           |      |           |            |      |           |               |      |           |        |      |             |                  |      |           |         |      |           |      |      |           |         |       |       |           |             |             |     |      |       |         |          |      |           |       |      |          |        |       |          |       |       |          |            |      |          |       |       |          |       |       |          |       |       |          |       |       |
|          | Lovech            | 13.0                            | 124,793.3                                |                    |                     |                         |          |         |      |           |             |             |     |         |      |           |        |      |           |         |      |           |        |      |           |         |      |           |      |      |           |             |      |           |         |                |      |             |              |              |     |              |      |           |             |      |           |               |       |             |                 |      |           |           |      |           |                 |      |             |           |      |           |            |      |           |               |      |           |        |      |             |                  |      |           |         |      |           |      |      |           |         |       |       |           |             |             |     |      |       |         |          |      |           |       |      |          |        |       |          |       |       |          |            |      |          |       |       |          |       |       |          |       |       |          |       |       |
|          | Montana           | 23.5                            | 129,617.3                                |                    |                     |                         |          |         |      |           |             |             |     |         |      |           |        |      |           |         |      |           |        |      |           |         |      |           |      |      |           |             |      |           |         |                |      |             |              |              |     |              |      |           |             |      |           |               |       |             |                 |      |           |           |      |           |                 |      |             |           |      |           |            |      |           |               |      |           |        |      |             |                  |      |           |         |      |           |      |      |           |         |       |       |           |             |             |     |      |       |         |          |      |           |       |      |          |        |       |          |       |       |          |            |      |          |       |       |          |       |       |          |       |       |          |       |       |
|          | Pernik            | 24.3                            | 120,830.3                                |                    |                     |                         |          |         |      |           |             |             |     |         |      |           |        |      |           |         |      |           |        |      |           |         |      |           |      |      |           |             |      |           |         |                |      |             |              |              |     |              |      |           |             |      |           |               |       |             |                 |      |           |           |      |           |                 |      |             |           |      |           |            |      |           |               |      |           |        |      |             |                  |      |           |         |      |           |      |      |           |         |       |       |           |             |             |     |      |       |         |          |      |           |       |      |          |        |       |          |       |       |          |            |      |          |       |       |          |       |       |          |       |       |          |       |       |
|          | Razgrad           | 24.6                            | 112,244.0                                |                    |                     |                         |          |         |      |           |             |             |     |         |      |           |        |      |           |         |      |           |        |      |           |         |      |           |      |      |           |             |      |           |         |                |      |             |              |              |     |              |      |           |             |      |           |               |       |             |                 |      |           |           |      |           |                 |      |             |           |      |           |            |      |           |               |      |           |        |      |             |                  |      |           |         |      |           |      |      |           |         |       |       |           |             |             |     |      |       |         |          |      |           |       |      |          |        |       |          |       |       |          |            |      |          |       |       |          |       |       |          |       |       |          |       |       |
|          | Ruse              | 14.5                            | 218,456.3                                |                    |                     |                         |          |         |      |           |             |             |     |         |      |           |        |      |           |         |      |           |        |      |           |         |      |           |      |      |           |             |      |           |         |                |      |             |              |              |     |              |      |           |             |      |           |               |       |             |                 |      |           |           |      |           |                 |      |             |           |      |           |            |      |           |               |      |           |        |      |             |                  |      |           |         |      |           |      |      |           |         |       |       |           |             |             |     |      |       |         |          |      |           |       |      |          |        |       |          |       |       |          |            |      |          |       |       |          |       |       |          |       |       |          |       |       |
|          | Targovishte       | 14.3                            | 111,661.7                                |                    |                     |                         |          |         |      |           |             |             |     |         |      |           |        |      |           |         |      |           |        |      |           |         |      |           |      |      |           |             |      |           |         |                |      |             |              |              |     |              |      |           |             |      |           |               |       |             |                 |      |           |           |      |           |                 |      |             |           |      |           |            |      |           |               |      |           |        |      |             |                  |      |           |         |      |           |      |      |           |         |       |       |           |             |             |     |      |       |         |          |      |           |       |      |          |        |       |          |       |       |          |            |      |          |       |       |          |       |       |          |       |       |          |       |       |
| Czechia  | Jihocesky kraj    | 73.8                            | 1,360,998.0                              | 10,626,430.0       | 10,653,156.3        | 1.0                     |          |         |      |           |             |             |     |         |      |           |        |      |           |         |      |           |        |      |           |         |      |           |      |      |           |             |      |           |         |                |      |             |              |              |     |              |      |           |             |      |           |               |       |             |                 |      |           |           |      |           |                 |      |             |           |      |           |            |      |           |               |      |           |        |      |             |                  |      |           |         |      |           |      |      |           |         |       |       |           |             |             |     |      |       |         |          |      |           |       |      |          |        |       |          |       |       |          |            |      |          |       |       |          |       |       |          |       |       |          |       |       |
|          | Jihomoravsky      | 25.7                            | 550,688.0                                |                    |                     |                         |          |         |      |           |             |             |     |         |      |           |        |      |           |         |      |           |        |      |           |         |      |           |      |      |           |             |      |           |         |                |      |             |              |              |     |              |      |           |             |      |           |               |       |             |                 |      |           |           |      |           |                 |      |             |           |      |           |            |      |           |               |      |           |        |      |             |                  |      |           |         |      |           |      |      |           |         |       |       |           |             |             |     |      |       |         |          |      |           |       |      |          |        |       |          |       |       |          |            |      |          |       |       |          |       |       |          |       |       |          |       |       |
|          | Karlovarsky       | 20.7                            | 640,909.0                                |                    |                     |                         |          |         |      |           |             |             |     |         |      |           |        |      |           |         |      |           |        |      |           |         |      |           |      |      |           |             |      |           |         |                |      |             |              |              |     |              |      |           |             |      |           |               |       |             |                 |      |           |           |      |           |                 |      |             |           |      |           |            |      |           |               |      |           |        |      |             |                  |      |           |         |      |           |      |      |           |         |       |       |           |             |             |     |      |       |         |          |      |           |       |      |          |        |       |          |       |       |          |            |      |          |       |       |          |       |       |          |       |       |          |       |       |
|          | Kraj Vysocina     | 118.5                           | 1,184,729.0                              |                    |                     |                         |          |         |      |           |             |             |     |         |      |           |        |      |           |         |      |           |        |      |           |         |      |           |      |      |           |             |      |           |         |                |      |             |              |              |     |              |      |           |             |      |           |               |       |             |                 |      |           |           |      |           |                 |      |             |           |      |           |            |      |           |               |      |           |        |      |             |                  |      |           |         |      |           |      |      |           |         |       |       |           |             |             |     |      |       |         |          |      |           |       |      |          |        |       |          |       |       |          |            |      |          |       |       |          |       |       |          |       |       |          |       |       |
|          | Kralovehradecky   | 47.6                            | 295,285.0                                |                    |                     |                         |          |         |      |           |             |             |     |         |      |           |        |      |           |         |      |           |        |      |           |         |      |           |      |      |           |             |      |           |         |                |      |             |              |              |     |              |      |           |             |      |           |               |       |             |                 |      |           |           |      |           |                 |      |             |           |      |           |            |      |           |               |      |           |        |      |             |                  |      |           |         |      |           |      |      |           |         |       |       |           |             |             |     |      |       |         |          |      |           |       |      |          |        |       |          |       |       |          |            |      |          |       |       |          |       |       |          |       |       |          |       |       |
|          | Liberecky         | 65.9                            | 441,608.0                                |                    |                     |                         |          |         |      |           |             |             |     |         |      |           |        |      |           |         |      |           |        |      |           |         |      |           |      |      |           |             |      |           |         |                |      |             |              |              |     |              |      |           |             |      |           |               |       |             |                 |      |           |           |      |           |                 |      |             |           |      |           |            |      |           |               |      |           |        |      |             |                  |      |           |         |      |           |      |      |           |         |       |       |           |             |             |     |      |       |         |          |      |           |       |      |          |        |       |          |       |       |          |            |      |          |       |       |          |       |       |          |       |       |          |       |       |
|          | Moravskoslezsky   | 30.5                            | 1,204,346.0                              |                    |                     |                         |          |         |      |           |             |             |     |         |      |           |        |      |           |         |      |           |        |      |           |         |      |           |      |      |           |             |      |           |         |                |      |             |              |              |     |              |      |           |             |      |           |               |       |             |                 |      |           |           |      |           |                 |      |             |           |      |           |            |      |           |               |      |           |        |      |             |                  |      |           |         |      |           |      |      |           |         |       |       |           |             |             |     |      |       |         |          |      |           |       |      |          |        |       |          |       |       |          |            |      |          |       |       |          |       |       |          |       |       |          |       |       |
|          | Olomoucky         | 92.8                            | 632,547.0                                |                    |                     |                         |          |         |      |           |             |             |     |         |      |           |        |      |           |         |      |           |        |      |           |         |      |           |      |      |           |             |      |           |         |                |      |             |              |              |     |              |      |           |             |      |           |               |       |             |                 |      |           |           |      |           |                 |      |             |           |      |           |            |      |           |               |      |           |        |      |             |                  |      |           |         |      |           |      |      |           |         |       |       |           |             |             |     |      |       |         |          |      |           |       |      |          |        |       |          |       |       |          |            |      |          |       |       |          |       |       |          |       |       |          |       |       |
|          | Pardubicky        | 39.5                            | 519,125.0                                |                    |                     |                         |          |         |      |           |             |             |     |         |      |           |        |      |           |         |      |           |        |      |           |         |      |           |      |      |           |             |      |           |         |                |      |             |              |              |     |              |      |           |             |      |           |               |       |             |                 |      |           |           |      |           |                 |      |             |           |      |           |            |      |           |               |      |           |        |      |             |                  |      |           |         |      |           |      |      |           |         |       |       |           |             |             |     |      |       |         |          |      |           |       |      |          |        |       |          |       |       |          |            |      |          |       |       |          |       |       |          |       |       |          |       |       |
|          | Plzensky kraj     | 38.1                            | 582,601.0                                |                    |                     |                         |          |         |      |           |             |             |     |         |      |           |        |      |           |         |      |           |        |      |           |         |      |           |      |      |           |             |      |           |         |                |      |             |              |              |     |              |      |           |             |      |           |               |       |             |                 |      |           |           |      |           |                 |      |             |           |      |           |            |      |           |               |      |           |        |      |             |                  |      |           |         |      |           |      |      |           |         |       |       |           |             |             |     |      |       |         |          |      |           |       |      |          |        |       |          |       |       |          |            |      |          |       |       |          |       |       |          |       |       |          |       |       |
|          | Prague            | 17.8                            | 1,301,135.0                              |                    |                     |                         |          |         |      |           |             |             |     |         |      |           |        |      |           |         |      |           |        |      |           |         |      |           |      |      |           |             |      |           |         |                |      |             |              |              |     |              |      |           |             |      |           |               |       |             |                 |      |           |           |      |           |                 |      |             |           |      |           |            |      |           |               |      |           |        |      |             |                  |      |           |         |      |           |      |      |           |         |       |       |           |             |             |     |      |       |         |          |      |           |       |      |          |        |       |          |       |       |          |            |      |          |       |       |          |       |       |          |       |       |          |       |       |
|          | Stredocesky kraj  | 31.4                            | 820,580.0                                |                    |                     |                         |          |         |      |           |             |             |     |         |      |           |        |      |           |         |      |           |        |      |           |         |      |           |      |      |           |             |      |           |         |                |      |             |              |              |     |              |      |           |             |      |           |               |       |             |                 |      |           |           |      |           |                 |      |             |           |      |           |            |      |           |               |      |           |        |      |             |                  |      |           |         |      |           |      |      |           |         |       |       |           |             |             |     |      |       |         |          |      |           |       |      |          |        |       |          |       |       |          |            |      |          |       |       |          |       |       |          |       |       |          |       |       |
|          | Ustecky           | 28.4                            | 509,019.0                                |                    |                     |                         |          |         |      |           |             |             |     |         |      |           |        |      |           |         |      |           |        |      |           |         |      |           |      |      |           |             |      |           |         |                |      |             |              |              |     |              |      |           |             |      |           |               |       |             |                 |      |           |           |      |           |                 |      |             |           |      |           |            |      |           |               |      |           |        |      |             |                  |      |           |         |      |           |      |      |           |         |       |       |           |             |             |     |      |       |         |          |      |           |       |      |          |        |       |          |       |       |          |            |      |          |       |       |          |       |       |          |       |       |          |       |       |
|          | Zlin              | 78.4                            | 582,860.0                                |                    |                     |                         |          |         |      |           |             |             |     |         |      |           |        |      |           |         |      |           |        |      |           |         |      |           |      |      |           |             |      |           |         |                |      |             |              |              |     |              |      |           |             |      |           |               |       |             |                 |      |           |           |      |           |                 |      |             |           |      |           |            |      |           |               |      |           |        |      |             |                  |      |           |         |      |           |      |      |           |         |       |       |           |             |             |     |      |       |         |          |      |           |       |      |          |        |       |          |       |       |          |            |      |          |       |       |          |       |       |          |       |       |          |       |       |
| Estonia  | Harju             | 149.6                           | 503,920.0                                | 1,177,920.0        | 1,179,085.3         | 1.0                     |          |         |      |           |             |             |     |         |      |           |        |      |           |         |      |           |        |      |           |         |      |           |      |      |           |             |      |           |         |                |      |             |              |              |     |              |      |           |             |      |           |               |       |             |                 |      |           |           |      |           |                 |      |             |           |      |           |            |      |           |               |      |           |        |      |             |                  |      |           |         |      |           |      |      |           |         |       |       |           |             |             |     |      |       |         |          |      |           |       |      |          |        |       |          |       |       |          |            |      |          |       |       |          |       |       |          |       |       |          |       |       |
|          | Hilu              | 434.4                           | 9,297.7                                  |                    |                     |                         |          |         |      |           |             |             |     |         |      |           |        |      |           |         |      |           |        |      |           |         |      |           |      |      |           |             |      |           |         |                |      |             |              |              |     |              |      |           |             |      |           |               |       |             |                 |      |           |           |      |           |                 |      |             |           |      |           |            |      |           |               |      |           |        |      |             |                  |      |           |         |      |           |      |      |           |         |       |       |           |             |             |     |      |       |         |          |      |           |       |      |          |        |       |          |       |       |          |            |      |          |       |       |          |       |       |          |       |       |          |       |       |
|          | Ida-Viru          | 19.4                            | 104,906.3                                |                    |                     |                         |          |         |      |           |             |             |     |         |      |           |        |      |           |         |      |           |        |      |           |         |      |           |      |      |           |             |      |           |         |                |      |             |              |              |     |              |      |           |             |      |           |               |       |             |                 |      |           |           |      |           |                 |      |             |           |      |           |            |      |           |               |      |           |        |      |             |                  |      |           |         |      |           |      |      |           |         |       |       |           |             |             |     |      |       |         |          |      |           |       |      |          |        |       |          |       |       |          |            |      |          |       |       |          |       |       |          |       |       |          |       |       |
|          | Jarva             | 92.3                            | 30,047.7                                 |                    |                     |                         |          |         |      |           |             |             |     |         |      |           |        |      |           |         |      |           |        |      |           |         |      |           |      |      |           |             |      |           |         |                |      |             |              |              |     |              |      |           |             |      |           |               |       |             |                 |      |           |           |      |           |                 |      |             |           |      |           |            |      |           |               |      |           |        |      |             |                  |      |           |         |      |           |      |      |           |         |       |       |           |             |             |     |      |       |         |          |      |           |       |      |          |        |       |          |       |       |          |            |      |          |       |       |          |       |       |          |       |       |          |       |       |
|          | Jogeva            | 116.8                           | 29,512.7                                 |                    |                     |                         |          |         |      |           |             |             |     |         |      |           |        |      |           |         |      |           |        |      |           |         |      |           |      |      |           |             |      |           |         |                |      |             |              |              |     |              |      |           |             |      |           |               |       |             |                 |      |           |           |      |           |                 |      |             |           |      |           |            |      |           |               |      |           |        |      |             |                  |      |           |         |      |           |      |      |           |         |       |       |           |             |             |     |      |       |         |          |      |           |       |      |          |        |       |          |       |       |          |            |      |          |       |       |          |       |       |          |       |       |          |       |       |
|          | Laane             | 334.0                           | 22,348.7                                 |                    |                     |                         |          |         |      |           |             |             |     |         |      |           |        |      |           |         |      |           |        |      |           |         |      |           |      |      |           |             |      |           |         |                |      |             |              |              |     |              |      |           |             |      |           |               |       |             |                 |      |           |           |      |           |                 |      |             |           |      |           |            |      |           |               |      |           |        |      |             |                  |      |           |         |      |           |      |      |           |         |       |       |           |             |             |     |      |       |         |          |      |           |       |      |          |        |       |          |       |       |          |            |      |          |       |       |          |       |       |          |       |       |          |       |       |
|          | Laane-Viru        | 54.2                            | 56,674.0                                 |                    |                     |                         |          |         |      |           |             |             |     |         |      |           |        |      |           |         |      |           |        |      |           |         |      |           |      |      |           |             |      |           |         |                |      |             |              |              |     |              |      |           |             |      |           |               |       |             |                 |      |           |           |      |           |                 |      |             |           |      |           |            |      |           |               |      |           |        |      |             |                  |      |           |         |      |           |      |      |           |         |       |       |           |             |             |     |      |       |         |          |      |           |       |      |          |        |       |          |       |       |          |            |      |          |       |       |          |       |       |          |       |       |          |       |       |
|          | Parnu             | 263.7                           | 80,744.7                                 |                    |                     |                         |          |         |      |           |             |             |     |         |      |           |        |      |           |         |      |           |        |      |           |         |      |           |      |      |           |             |      |           |         |                |      |             |              |              |     |              |      |           |             |      |           |               |       |             |                 |      |           |           |      |           |                 |      |             |           |      |           |            |      |           |               |      |           |        |      |             |                  |      |           |         |      |           |      |      |           |         |       |       |           |             |             |     |      |       |         |          |      |           |       |      |          |        |       |          |       |       |          |            |      |          |       |       |          |       |       |          |       |       |          |       |       |
|          | Polva             | 186.8                           | 26,763.7                                 |                    |                     |                         |          |         |      |           |             |             |     |         |      |           |        |      |           |         |      |           |        |      |           |         |      |           |      |      |           |             |      |           |         |                |      |             |              |              |     |              |      |           |             |      |           |               |       |             |                 |      |           |           |      |           |                 |      |             |           |      |           |            |      |           |               |      |           |        |      |             |                  |      |           |         |      |           |      |      |           |         |       |       |           |             |             |     |      |       |         |          |      |           |       |      |          |        |       |          |       |       |          |            |      |          |       |       |          |       |       |          |       |       |          |       |       |
|          | Rapla             | 249.3                           | 33,198.7                                 |                    |                     |                         |          |         |      |           |             |             |     |         |      |           |        |      |           |         |      |           |        |      |           |         |      |           |      |      |           |             |      |           |         |                |      |             |              |              |     |              |      |           |             |      |           |               |       |             |                 |      |           |           |      |           |                 |      |             |           |      |           |            |      |           |               |      |           |        |      |             |                  |      |           |         |      |           |      |      |           |         |       |       |           |             |             |     |      |       |         |          |      |           |       |      |          |        |       |          |       |       |          |            |      |          |       |       |          |       |       |          |       |       |          |       |       |
|          | Saare             | 920.4                           | 33,107.7                                 |                    |                     |                         |          |         |      |           |             |             |     |         |      |           |        |      |           |         |      |           |        |      |           |         |      |           |      |      |           |             |      |           |         |                |      |             |              |              |     |              |      |           |             |      |           |               |       |             |                 |      |           |           |      |           |                 |      |             |           |      |           |            |      |           |               |      |           |        |      |             |                  |      |           |         |      |           |      |      |           |         |       |       |           |             |             |     |      |       |         |          |      |           |       |      |          |        |       |          |       |       |          |            |      |          |       |       |          |       |       |          |       |       |          |       |       |
|          | Tartu             | 113.4                           | 138,982.7                                |                    |                     |                         |          |         |      |           |             |             |     |         |      |           |        |      |           |         |      |           |        |      |           |         |      |           |      |      |           |             |      |           |         |                |      |             |              |              |     |              |      |           |             |      |           |               |       |             |                 |      |           |           |      |           |                 |      |             |           |      |           |            |      |           |               |      |           |        |      |             |                  |      |           |         |      |           |      |      |           |         |       |       |           |             |             |     |      |       |         |          |      |           |       |      |          |        |       |          |       |       |          |            |      |          |       |       |          |       |       |          |       |       |          |       |       |



|         |                            |        |              |              |              |     |
|---------|----------------------------|--------|--------------|--------------|--------------|-----|
|         | Valga                      | 30.4   | 27,917.0     |              |              |     |
|         | Vilijandi                  | 175.8  | 46,604.0     |              |              |     |
|         | Voru                       | 155.5  | 33,894.7     |              |              |     |
| Finland | Aland Islands              | 1980.7 | 29,750.7     | 5,451,328.0  | 5,524,450.0  | 1.0 |
|         | Central Finland            | 103.1  | 252,887.0    |              |              |     |
|         | Central Ostrobothnia       | 45.4   | 77,763.0     |              |              |     |
|         | Central Savonia            | 97.0   | 41,210.3     |              |              |     |
|         | Finland Proper             | 171.2  | 481,930.3    |              |              |     |
|         | Helsinki-Uusimaa           | 119.0  | 1,671,543.0  |              |              |     |
|         | Kymenlaakson               | 195.8  | 166,784.7    |              |              |     |
|         | Lapland                    | 11.1   | 117,400.7    |              |              |     |
|         | North Karelia              | 145.1  | 165,531.0    |              |              |     |
|         | Northern Ostrobothnia      | 29.2   | 409,673.7    |              |              |     |
|         | Northern Savonia           | 98.6   | 245,655.3    |              |              |     |
|         | Päijät-Hämeen              | 46.1   | 211,175.0    |              |              |     |
|         | Pirkanmaa                  | 29.4   | 535,057.3    |              |              |     |
|         | Satakunta                  | 61.9   | 218,680.7    |              |              |     |
|         | South Karelia              | 204.3  | 128,856.3    |              |              |     |
|         | South Ostrobothnia         | 21.2   | 194,600.3    |              |              |     |
|         | Southern Savonia           | 63.8   | 100,248.0    |              |              |     |
|         | Tavastia Proper            | 40.0   | 171,733.7    |              |              |     |
|         | Vaasa                      | 69.5   | 169,730.0    |              |              |     |
|         | West Ostrobothnia          | 13.6   | 61,117.0     |              |              |     |
| France  | Auvergne-Rhône-Alpes       | 190.7  | 8,153,233.0  | 65,627,454.0 | 65,627,454.0 | 1.0 |
|         | Bourgogne-Franche-Comté    | 94.9   | 2,785,393.0  |              |              |     |
|         | Bretagne                   | 54.3   | 3,402,932.0  |              |              |     |
|         | Centre-Val de Loire        | 61.3   | 2,564,915.0  |              |              |     |
|         | Corse                      | 24.3   | 349,465.0    |              |              |     |
|         | Grand Est                  | 210.3  | 5,542,094.0  |              |              |     |
|         | Hauts-De-France            | 56.2   | 5,987,172.0  |              |              |     |
|         | Ile-de-France              | 66.0   | 12,395,148.0 |              |              |     |
|         | Normandie                  | 32.2   | 3,307,286.0  |              |              |     |
|         | Nouvelle-Aquitaine         | 66.3   | 6,081,985.0  |              |              |     |
|         | Occitanie                  | 104.5  | 6,053,548.0  |              |              |     |
|         | Pays de la Loire           | 45.3   | 3,873,096.0  |              |              |     |
|         | Provence-Alpes-Cote d'Azur | 31.3   | 5,131,187.0  |              |              |     |
| Germany | Baden-Württemberg          | 203.0  | 11,103,043.0 | 82,509,232.0 | 83,400,000.0 | 1.0 |
|         | Bavaria (Bayern)           | 275.0  | 13,108,586.7 |              |              |     |
|         | Berlin                     | 123.8  | 3,695,901.7  |              |              |     |
|         | Brandenburg                | 301.9  | 2,518,611.0  |              |              |     |
|         | Hamburg                    | 80.3   | 1,852,478.0  |              |              |     |
|         | Hessen                     | 203.0  | 6,293,154.0  |              |              |     |
|         | Mecklenburg-Vorpommern     | 249.4  | 1,608,627.3  |              |              |     |

|           |                                          |       |              |              |              |     |
|-----------|------------------------------------------|-------|--------------|--------------|--------------|-----|
|           | Niedersachsen (Lower Saxony)             | 223.4 | 8,003,421.0  |              |              |     |
|           | Nordrhein-Westfalen                      | 143.4 | 17,925,570.0 |              |              |     |
|           | Rheinland-Pfalz                          | 208.5 | 4,090,807.3  |              |              |     |
|           | Saarland**                               | 33.6  | 988,129.3    |              |              |     |
|           | Sachsen (Saxony)                         | 447.9 | 4,074,060.0  |              |              |     |
|           | Sachsen-Anhalt (Saxony-Anhalt)           | 293.3 | 2,199,312.7  |              |              |     |
|           | Schleswig-Holstein                       | 146.8 | 2,910,875.0  |              |              |     |
|           | Thuringen                                | 377.7 | 2,136,655.0  |              |              |     |
| Hungary   | Csongrad                                 | 31.1  | 406,774.0    | 2,510,260.8  | 9,872,900.3  | 0.3 |
|           | Fejer                                    | 11.3  | 417,408.4    |              |              |     |
|           | Komarom-Esztergom                        | 15.5  | 299,132.2    |              |              |     |
|           | Nograd                                   | 84.1  | 196,056.7    |              |              |     |
|           | Somogy                                   | 15.3  | 312,685.2    |              |              |     |
|           | Vas                                      | 21.6  | 254,383.5    |              |              |     |
|           | Veszprem                                 | 23.6  | 346,189.0    |              |              |     |
|           | Zala                                     | 12.4  | 277,631.8    |              |              |     |
| Latvia    | Kurzeme                                  | 49.0  | 244,896.7    | 1,942,629.0  | 1,933,428.6  | 1.0 |
|           | Latgale                                  | 16.8  | 267,692.7    |              |              |     |
|           | Pierigas                                 | 33.8  | 366,953.0    |              |              |     |
|           | Riga                                     | 23.0  | 638,522.0    |              |              |     |
|           | Vidzeme                                  | 32.8  | 190,426.3    |              |              |     |
|           | Zemgale                                  | 10.7  | 234,138.3    |              |              |     |
| Lithuania | Alytaus                                  | 48.2  | 141,606.7    | 2,848,454.3  | 2,828,402.5  | 1.0 |
|           | Kauno                                    | 111.4 | 570,115.0    |              |              |     |
|           | Klaipedos                                | 39.9  | 320,792.3    |              |              |     |
|           | Marijampoles                             | 48.5  | 145,241.3    |              |              |     |
|           | Panevezio                                | 129.4 | 224,920.0    |              |              |     |
|           | Siaulai                                  | 75.1  | 270,759.3    |              |              |     |
|           | Taurages                                 | 103.6 | 98,541.7     |              |              |     |
|           | Telsiai                                  | 91.8  | 137,733.7    |              |              |     |
|           | Utenos                                   | 102.7 | 133,437.7    |              |              |     |
|           | Vilnius                                  | 113.4 | 805,306.7    |              |              |     |
| Norway    | Aust-Agder                               | 32.2  | 242,401.0    | 1,714,461.7  | 5,330,470.3  | 0.3 |
|           | More og Romsdal                          | 24.3  | 193,574.0    |              |              |     |
|           | Rogaland                                 | 12.0  | 419,968.7    |              |              |     |
|           | Vestfold                                 | 15.7  | 347,342.0    |              |              |     |
|           | Vestland                                 | 23.9  | 511,176.0    |              |              |     |
| Poland    | Greater Poland (Wielkopolskie)           | 17.3  | 3,487,578.0  | 38,426,649.0 | 38,409,094.0 | 1.0 |
|           | Kuyavian-Pomeranian (Kujawsko-Pomorskie) | 23.7  | 2,096,001.0  |              |              |     |
|           | Lesser Poland (Malopolskie)              | 99.0  | 3,395,886.0  |              |              |     |
|           | Lodz                                     | 25.1  | 2,469,948.0  |              |              |     |
|           | Lower Silesian                           | 29.7  | 2,909,660.0  |              |              |     |

|              |                                        |       |                    |             |              |     |
|--------------|----------------------------------------|-------|--------------------|-------------|--------------|-----|
|              | Lublin (Lubelskie)                     | 90.8  | 2,120,626.0        |             |              |     |
|              | Lubusz (Lubuskie)                      | 61.1  | 1,023,532.0        |             |              |     |
|              | Masovia (Mazowieckie)                  | 37.4  | 5,386,169.0        |             |              |     |
|              | Opole (Opolskie)                       | 72.0  | 986,913.0          |             |              |     |
|              | Podlaskie                              | 115.3 | 1,181,384.0        |             |              |     |
|              | Pomeranian (Pomorskie)                 | 60.1  | 2,327,987.0        |             |              |     |
|              | Silesian (Slaskie)                     | 55.1  | 4,539,820.0        |             |              |     |
|              | Subcarpathian (Podkarpackie)           | 72.4  | 2,127,828.0        |             |              |     |
|              | Swietokrzyskie (Holy Cross)            | 32.3  | 1,244,310.0        |             |              |     |
|              | Warmian-Masurian (Warminsko-mazurskie) | 95.9  | 1,431,162.0        |             |              |     |
|              | West Pomeranian (Zachodniopomorskie)   | 49.7  | 1,697,845.0        |             |              |     |
| Romania      | Maramures                              | 13.1  | 467,096.3          | 681,209.7   | 19,631,264.3 | 0.0 |
|              | Salaj                                  | 14.1  | 214,113.3          |             |              |     |
| Serbia       | Kolubarski                             | 59.6  | 174,513.0          | 1,930,283.0 | 7,093,126.7  | 0.3 |
|              | Mačvanski                              | 30.0  | 298,931.0          |             |              |     |
|              | Moravički                              | 14.4  | 212,603.0          |             |              |     |
|              | Pčinjski                               | 11.3  | 159,081.0          |             |              |     |
|              | Podunavski                             | 17.2  | 199,395.0          |             |              |     |
|              | Pomoravski                             | 13.5  | 214,536.0          |             |              |     |
|              | Rasinski                               | 24.8  | 241,999.0          |             |              |     |
|              | Raški                                  | 13.5  | 309,258.0          |             |              |     |
|              | Zaječarski                             | 12.5  | 119,967.0          |             |              |     |
| Slovakia     | Banskobystricky                        | 24.6  | 649,723.7          | 1,928,134.0 | 5,442,961.3  | 0.4 |
|              | Trenciansky                            | 24.7  | 587,354.0          |             |              |     |
|              | Zilinsky kraj                          | 28.1  | 691,056.3          |             |              |     |
| Slovenia     | Celje                                  | 192.3 | 302,406.0          | 2,066,594.3 | 2,067,079.3  | 1.0 |
|              | Koper                                  | 231.7 | 149,326.0          |             |              |     |
|              | Kranj                                  | 356.0 | 203,649.7          |             |              |     |
|              | Ljublijana                             | 236.4 | 661,481.3          |             |              |     |
|              | Maribor                                | 213.7 | 321,575.0          |             |              |     |
|              | Mestna Obcina Nova Gorica              | 467.3 | 101,264.3          |             |              |     |
|              | Murska Sobota                          | 385.0 | 115,197.7          |             |              |     |
|              | Novo Mesto                             | 301.5 | 140,960.0          |             |              |     |
|              | Obcina Ravne na Koroskem               | 288.3 | 70,734.3           |             |              |     |
| <b>Total</b> |                                        |       |                    |             |              |     |
|              |                                        |       | <b>221,985,818</b> |             |              |     |

LB, Lyme borreliosis; PPY, population per year.

\*For 25 European countries with publicly available surveillance data available 2005–2020.

**Figure S1** Sub-national incidence<sup>a</sup> (cases per 100,000 PPY) of LB from national surveillance networks in Eastern Europe

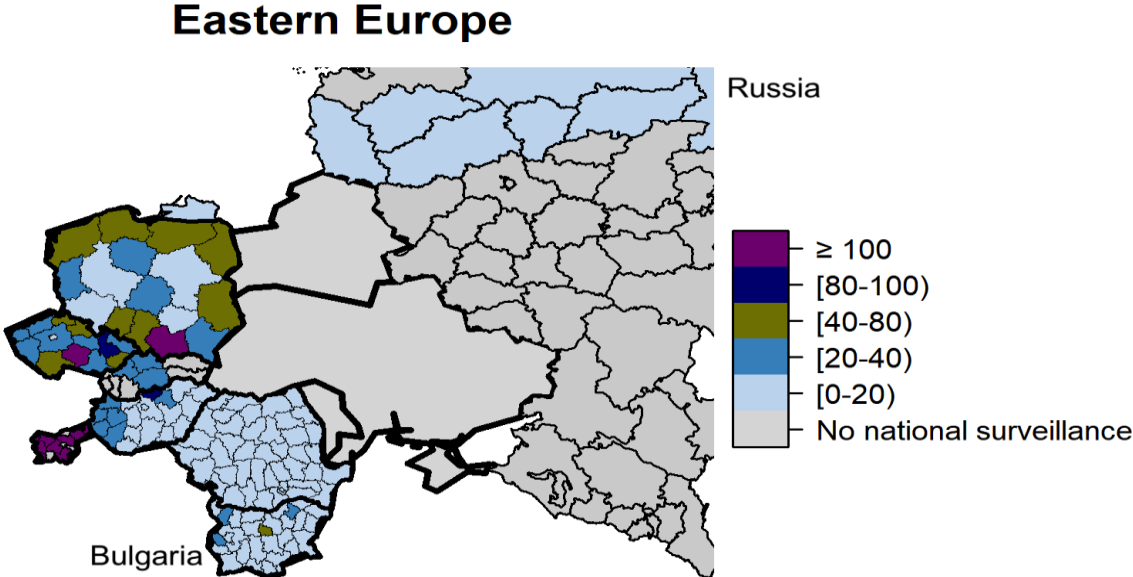

LB, Lyme borreliosis; PPY, population per year.

<sup>a</sup>Weighted mean for the most recent 3-year period available (all case definitions).

**Figure S2** Sub-national incidence<sup>a</sup> (cases per 100,000 PPY) of LB from national surveillance networks in Northern Europe

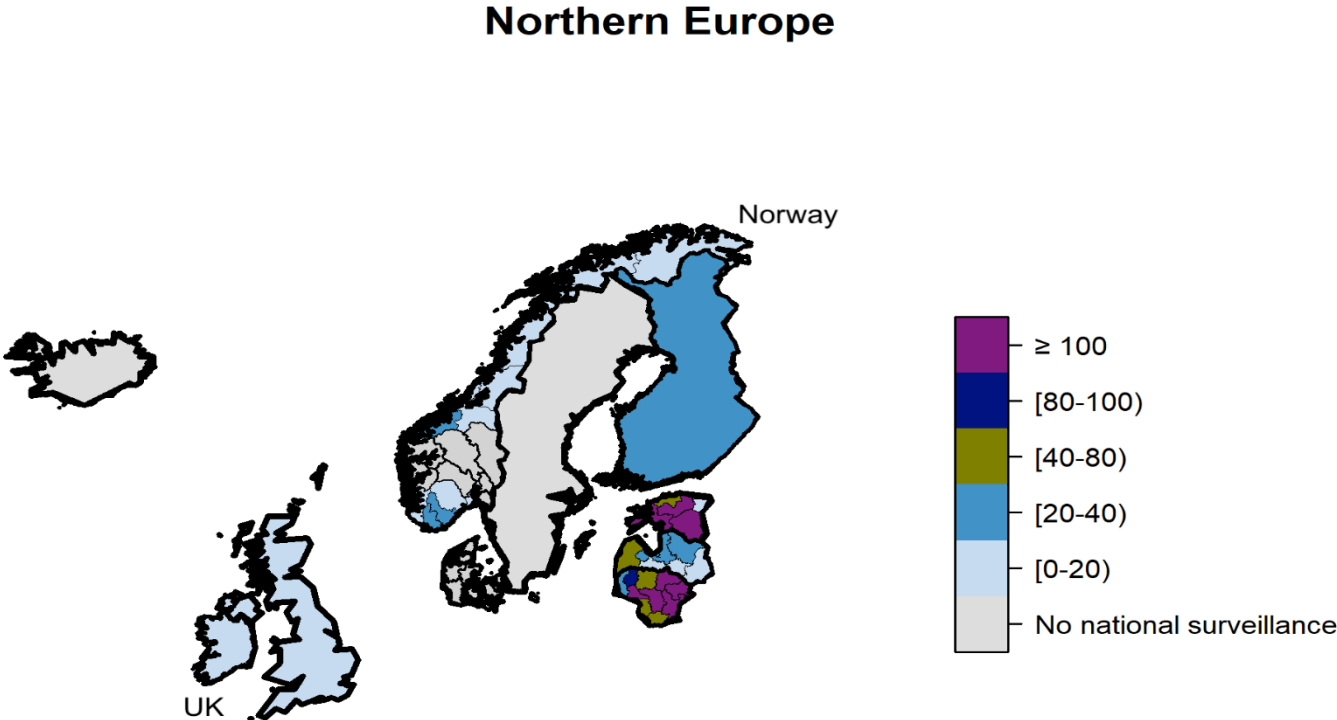

LB, Lyme borreliosis; PPY, population per year.  
<sup>a</sup>Weighted mean for the most recent 3-year period available (all case definitions).

**Figure S3** Sub-national incidence<sup>a</sup> (cases per 100,000 PPY) of LB from national surveillance networks in Southern Europe

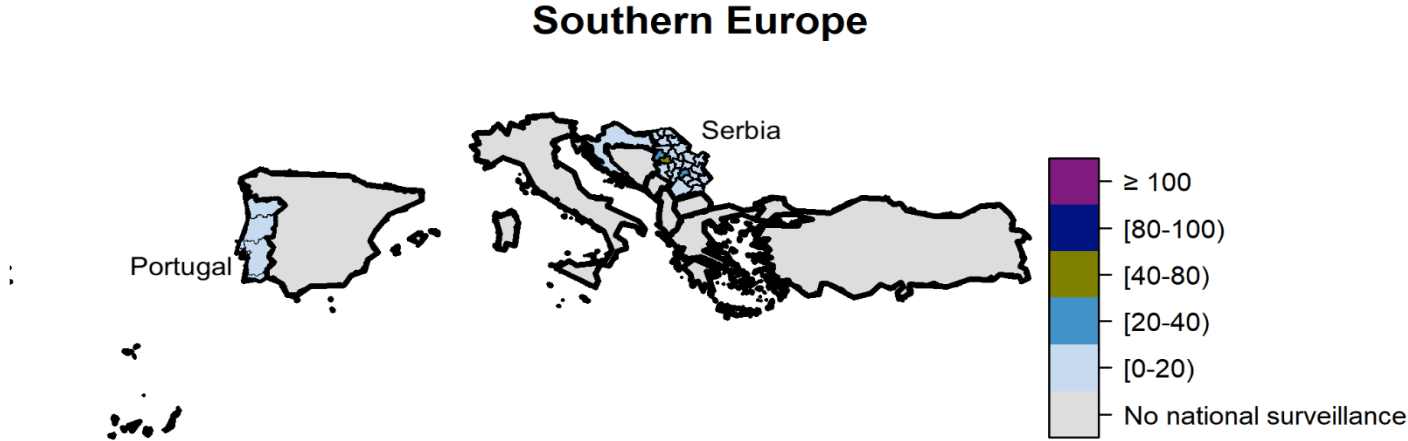

LB, Lyme borreliosis; PPY, population per year.  
<sup>a</sup>Weighted mean for the most recent 3-year period available (all case definitions).

**Figure S4** Sub-national incidence<sup>a</sup> (cases per 100,000 PPY) of LB from national surveillance networks in Western Europe

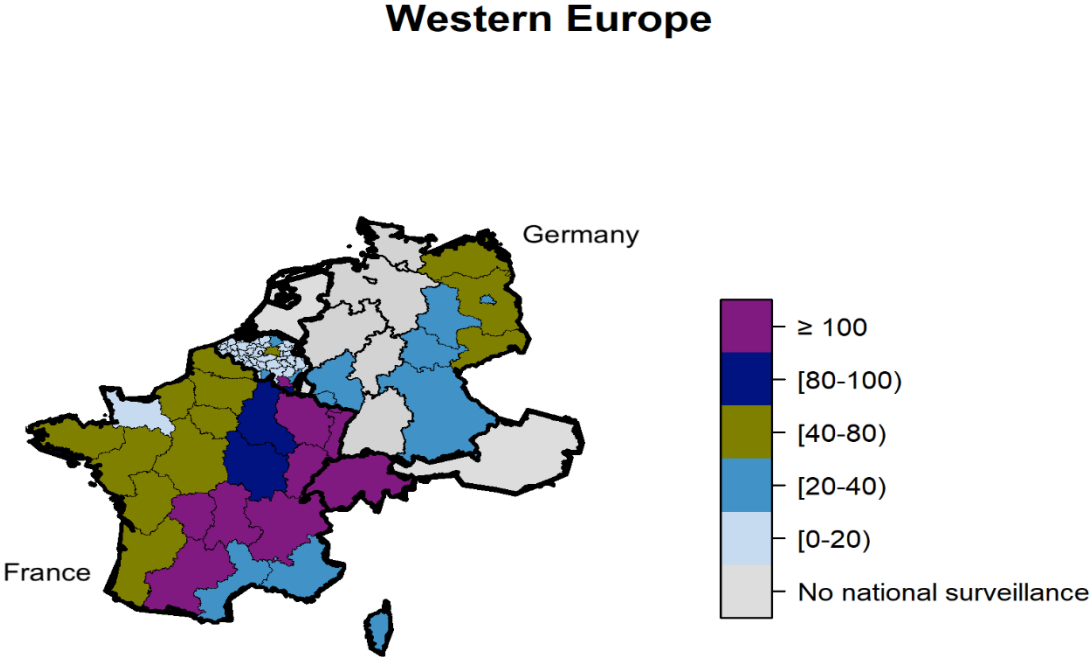

LB, Lyme borreliosis; PPY, population per year.  
<sup>a</sup>Weighted mean for the most recent 3-year period available (all case definitions).
